# Supplementary material for: Antarctic Bioconstructional Bryozoans from Terra Nova Bay (Ross Sea): Morphology, Skeletal Structures and Biomineralization
Source: MDPI journal article supplement (doi:10.3390/min13020246), 2023-02-09
Supplement: s1 [file s1]

## Supplementary Material

**Table S1.** Zooid morphometrics of *Cellarinella nutti* Rogick 1956, *Cellarinella njegovanae* Rogick 1956 and *Reteporella frigida* Waters 1904. Where present, number of bands (n° band) are reported *per colony per species* in a decreasing order, from the youngest (n° 7 for *C. nutti*, n°5 for *C. njegovanae*, at the proximal part of the branch), below the growing edge, to the oldest part of the branch (n°1); for each band, three positions are reported: distal, middle and proximal. Measurements of zooid length and orifice width - expressed in  $\mu\text{m}$  (mean  $\pm$  standard deviation (s.d.) - are reported for each position within the band and provided as mean values for each band. Replicate measurements have been conducted on 30 zooids *per band*.

### *C. nutti*

| N°of band | Position within the band | Mean zooid length $\pm$ s.d. (per position) | Mean orifice width $\pm$ s.d. (per position) | Mean zooid length $\pm$ s.d. (per band) | Mean orifice width $\pm$ s.d (per band) |
|-----------|--------------------------|---------------------------------------------|----------------------------------------------|-----------------------------------------|-----------------------------------------|
| 7         | distal                   | 1192 $\pm$ 99.59                            | 243.33 $\pm$ 77.29                           |                                         |                                         |
| 7         | middle                   | 1177 $\pm$ 114.31                           | 353.33 $\pm$ 30.76                           |                                         |                                         |
| 7         | proximal                 | 928 $\pm$ 167.54                            | 366.33 $\pm$ 11.54                           | 1118.5 $\pm$ 165.19                     | 321.11 $\pm$ 27.98                      |
| 6         | distal                   | 1178 $\pm$ 65.72                            | 286.66 $\pm$ 15.27                           |                                         |                                         |
| 6         | middle                   | 1162 $\pm$ 47.61                            | 316.66 $\pm$ 15.27                           |                                         |                                         |
| 6         | proximal                 | 912 $\pm$ 190.18                            | 363.33 $\pm$ 23.09                           | 1087.05 $\pm$ 163.39                    | 322.22 $\pm$ 17.88                      |
| 5         | distal                   | 1044 $\pm$ 109.22                           | 290.33 $\pm$ 20.50                           |                                         |                                         |
| 5         | middle                   | 1013 $\pm$ 156.08                           | 356.66 $\pm$ 15.05                           |                                         |                                         |
| 5         | proximal                 | 968 $\pm$ 192.53                            | 360.00 $\pm$ 17.32                           | 1011.25 $\pm$ 150.48                    | 335.67 $\pm$ 17.62                      |
| 4         | distal                   | 878 $\pm$ 30.33                             | 244.67 $\pm$ 30.74                           |                                         |                                         |
| 4         | middle                   | 956 $\pm$ 67.19                             | 316.83 $\pm$ 14.97                           |                                         |                                         |
| 4         | proximal                 | 1050.2 $\pm$ 78.01                          | 350.00 $\pm$ 36.05                           | 960.05 $\pm$ 86.79                      | 303.83 $\pm$ 27.25                      |
| 3         | distal                   | 1142 $\pm$ 21.67                            | 300.00 $\pm$ 0.00                            |                                         |                                         |
| 3         | middle                   | 1182 $\pm$ 94.49                            | 303.33 $\pm$ 45.89                           |                                         |                                         |
| 3         | proximal                 | 936 $\pm$ 231.79                            | 296.66 $\pm$ 42.42                           | 1110.5 $\pm$ 163.11                     | 300.00 $\pm$ 29.44                      |
| 2         | distal                   | 1020 $\pm$ 92.19                            | 250.33 $\pm$ 15.27                           |                                         |                                         |
| 2         | middle                   | 1124 $\pm$ 105.49                           | 326.66 $\pm$ 15.27                           |                                         |                                         |
| 2         | proximal                 | 917.5 $\pm$ 206.13                          | 330.00 $\pm$ 10.00                           | 1018.66 $\pm$ 120.05                    | 302.33 $\pm$ 20.30                      |
| 1         | distal                   | 912 $\pm$ 52.15                             | 326.67 $\pm$ 23.09                           |                                         |                                         |
| 1         | middle                   | 1136 $\pm$ 265.85                           | 383.33 $\pm$ 19.66                           |                                         |                                         |
| 1         | proximal                 | 624 $\pm$ 48.98                             | 330.00 $\pm$ 28.72                           | 989.41 $\pm$ 233.22                     | 346.67 $\pm$ 23.83                      |

### *C. njegovanae*

| N°of band | Position within the band | Mean zooid length $\pm$ s.d. (per position) | Mean orifice width $\pm$ s.d. (per position) | Mean zooid length $\pm$ s.d. (per band) | Mean orifice width $\pm$ s.d (per band). |
|-----------|--------------------------|---------------------------------------------|----------------------------------------------|-----------------------------------------|------------------------------------------|
| 5         | distal                   | 1105.00 $\pm$ 163.61                        | 366.67 $\pm$ 41.63                           |                                         |                                          |
| 5         | middle                   | 907 $\pm$ 158.95                            | 351.67 $\pm$ 20.41                           |                                         |                                          |
| 5         | proximal                 | 972.50 $\pm$ 63.96                          | 330.00 $\pm$ 26.45                           | 994.83 $\pm$ 128.84                     | 209.44 $\pm$ 29.50                       |
| 4         | distal                   | 712.00 $\pm$ 47.64                          | 323.33 $\pm$ 5.77                            |                                         |                                          |
| 4         | middle                   | 824.00 $\pm$ 63.48                          | 320.00 $\pm$ 34.64                           |                                         |                                          |
| 4         | proximal                 | 1118.33 $\pm$ 55.28                         | 300.33 $\pm$ 0.57                            | 884.78 $\pm$ 53.47                      | 314.56 $\pm$ 13.67                       |

|   |          |                 |              |               |              |
|---|----------|-----------------|--------------|---------------|--------------|
| 3 | distal   | 722.50 ± 56.78  | 316.66±23.09 |               |              |
| 3 | middle   | 742.00±106.23   | 316.67±25.17 |               |              |
| 3 | proximal | 1156.00 ± 76.35 | 312.33±15.27 | 873.50±79.75  | 315.56±21.18 |
| 2 | distal   | 682.50 ± 27.53  | 293.33±20.81 |               |              |
| 2 | middle   | 720.00 ±85.89   | 308.33±30.65 |               |              |
| 2 | proximal | 990.00 ± 121.86 | 300.00±52.91 | 797.50±78.43  | 300.56±34.78 |
| 1 | distal   | 766.00±47.23    | 290.00±17.32 |               |              |
| 1 | middle   | 786.67±109.77   | 328.33±27.14 |               |              |
| 1 | proximal | 1070.00±31.62   | 313.33±5.73  | 874.22± 62.87 | 310.56±16.74 |

| <i>R. frigida</i> | Mean zooid length<br>± s.d. | Mean orifice width<br>± s.d |
|-------------------|-----------------------------|-----------------------------|
|                   | 823.33±69.86                | 192.90±18.24                |
